# Supplementary material for: Genome-wide analysis of basic helix–loop–helix genes in Dendrobium catenatum and functional characterization of DcMYC2 in jasmonate-mediated immunity to Sclerotium delphinii
Source: Front Plant Sci. 2022 Aug 2;13:956210. doi: 10.3389/fpls.2022.956210 (PMC9378844; doi:10.3389/fpls.2022.956210)
Supplement: Supplementary file 7 [file Table_6.XLSX]

## Sheet: Drought
Table S6 DcbHLHs expression data of D. catenatum under drought stress
GeneID	DR5	DR6	DR7	DR8	DR10	DR11	DR15
DcbHLH003	0.293098	0.057531	0.148243	0	0	0	0.03901
DcbHLH004	1.32008	0.941148	0.547018	0.700614	0.546332	0.995742	0.949625
DcbHLH005	5.08467	13.6141	9.81578	8.94654	14.4094	2.61585	20.0755
DcbHLH006	0.06908	0.049905	0	0.072679	0.189984	0.309583	0.164707
DcbHLH007	0.528361	7.13422	0	0.479828	1.5017	10.2489	0.170957
DcbHLH009	2.13746	3.4901	1.15671	1.44183	2.15417	0.617185	8.57324
DcbHLH011	62.0241	78.8211	75.523	67.7025	70.5586	56.1265	63.6615
DcbHLH012	69.1077	55.6971	75.9749	69.9947	59.5122	55.2736	73.8152
DcbHLH013	0.48452	3.9379	0.266904	0.212611	1.50558	0	0.08875
DcbHLH015	0	0	0	0.31154	0	0	0.128963
DcbHLH017	18.7266	12.7959	8.71176	11.0564	9.18072	15.2463	17.725
DcbHLH018	1.3938	12.7175	0.926344	3.42904	2.63292	3.34953	4.35732
DcbHLH019	0.17375	10.0552	1.01479	0.283449	5.26467	1.82021	0
DcbHLH020	6.82768	11.1661	10.1529	6.94551	13.2841	7.30799	5.53744
DcbHLH021	6.91923	6.82892	10.4167	2.45111	8.67302	4.72578	2.35421
DcbHLH022	0.859612	0.783842	0.73758	0.264741	0.28969	0.040802	0.242079
DcbHLH023	1.97414	7.26134	2.33577	2.29917	2.5076	2.43541	1.67775
DcbHLH024	0	0	0.440301	0	0	0	0
DcbHLH025	0.031101	0.202563	0	0.116272	0.44112	0.098473	0.059529
DcbHLH026	33.3494	27.4657	98.6215	28.4284	32.2212	15.8933	6.94026
DcbHLH027	27.6441	32.2918	30.5689	29.8333	29.4762	22.2688	11.4458
DcbHLH028	6.27834	6.68977	4.54165	1.98695	3.56136	3.26598	1.11656
DcbHLH029	82.2495	59.6938	53.4075	29.3918	42.9908	71.9307	65.4321
DcbHLH030	4.67943	6.07328	6.89156	3.20538	5.63934	2.07651	3.12564
DcbHLH031	0	0.462548	2.44726	1.67237	3.28804	1.04911	2.05361
DcbHLH032	0	0.430992	0.88501	0.162352	0.073035	0.30216	0
DcbHLH033	0	0.742655	1.53362	0.311497	0.172007	0.807095	0
DcbHLH034	0.437291	0.249698	0.266481	0.441666	0.34765	0.697801	0.220439
DcbHLH036	14.2954	12.4167	22.148	15.2587	12.9558	12.8415	12.5846
DcbHLH037	19.5972	16.2126	7.93014	8.4711	11.4708	17.077	7.7605
DcbHLH038	54.9219	33.1534	23.0536	22.8574	27.7415	34.3627	27.5994
DcbHLH039	56.5124	45.0251	39.4775	39.0364	40.9287	55.8882	44.1998
DcbHLH040	68.6915	60.5771	47.9796	52.6845	36.2664	54.7859	33.2497
DcbHLH041	3.07306	0.447027	0.512147	0.760083	0.511714	1.31171	0.568064
DcbHLH042	0	0.061269	0	0.115092	0	0	0
DcbHLH043	0	0.117664	0	0	0	0	0
DcbHLH044	0	0.419743	0.10544	0	1.11588	0.052982	0
DcbHLH045	37.7502	26.2792	23.4829	18.9065	15.2403	15.3042	11.5293
DcbHLH046	0	0.331568	0.035975	0.213356	0.033812	0.188809	0.395901
DcbHLH047	20.0524	15.3234	25.8945	26.5485	23.7619	22.1167	20.5595
DcbHLH048	0	0.327431	0.172728	0.21919	0.633699	0.280708	0.13416
DcbHLH049	20.844	30.2357	27.1216	56.6285	53.4275	23.163	42.8029
DcbHLH050	0	0	0.219639	0	0.117198	0	0
DcbHLH051	0.568783	0.141689	0	0	0	0.336365	0.124224
DcbHLH052	74.497	38.895	113.373	53.3498	87.944	47.8381	125.175
DcbHLH053	1.3197	1.9338	1.18995	1.00321	1.85656	2.1708	1.17028
DcbHLH054	28.8116	8.28217	5.19585	4.32903	0.411735	38.0276	0.430233
DcbHLH055	4.62503	4.45613	2.48943	7.6272	4.33841	8.23002	5.21145
DcbHLH056	6.69059	3.26069	3.67241	10.3722	2.7154	5.87248	3.61374
DcbHLH057	168.27	97.2335	90.5411	52.7837	37.6983	136.697	39.7835
DcbHLH058	0	0	0.066505	0.096759	0.141158	0.033418	0
DcbHLH059	0	0	0	0.088436	0	0	0
DcbHLH060	0.059035	0.503353	0	0	0.464635	0.270793	0.574869
DcbHLH062	0.217297	2.00372	0	0.162472	0.257627	1.7701	0.49956
DcbHLH063	0.249714	0.289344	0.112657	0.02946	0.090659	0.203201	0.030505
DcbHLH064	0	0	0	0	0	0.074971	0.077657
DcbHLH065	4.21836	10.942	3.67837	18.554	2.8164	1.17872	2.25141
DcbHLH066	0.0521327	0.121942	0.0721615	0.121811	0.102871	0.205257	0.224793
DcbHLH072	17.8789	8.51377	19.4434	14.5626	12.955	19.1762	12.6692
DcbHLH073	29.876	31.1402	44.7571	38.9885	34.6657	38.4608	28.4904
DcbHLH074	53.6062	40.7272	61.2452	34.8799	30.5684	36.0873	30.0784
DcbHLH075	31.9104	15.1225	48.1108	37.1067	25.5421	14.77	14.179
DcbHLH076	0.583546	1.77695	0.4636	0.743622	0.797653	1.59066	1.22589
DcbHLH077	0.358527	0.706192	1.12597	1.00915	2.00012	1.01828	1.92162
DcbHLH078	0	0.105327	0.203819	0	0.33935	0.470353	0
DcbHLH079	0.256265	0.376478	0	0	0.066193	0.59257	0.258157
DcbHLH080	0.296091	0.297133	0	0.099491	0.445038	0.186497	0.154337
DcbHLH081	0.696857	1.61042	0.502286	0.277758	2.92659	1.33611	2.04544
DcbHLH082	8.11658	18.3647	0.984332	3.16374	5.7105	32.1398	2.43138
DcbHLH083	29.5872	20.7993	21.5705	17.722	18.4433	15.9252	11.346
DcbHLH084	66.7955	34.6702	35.4475	33.7142	34.3014	27.6579	30.6514
DcbHLH085	1.75441	0.495669	0.515385	0.352469	0.458076	0.609844	0.509701
DcbHLH086	3.09998	5.58311	6.57537	4.94977	7.54293	5.52342	8.56971
DcbHLH087	0	4.06258	5.84835	5.10226	4.9305	6.78231	6.81628
DcbHLH088	0.575246	0.545045	0	0.0912217	0.273351	0.30965	0.829472
DcbHLH089	2.85876	0.837959	0.128426	0.125882	0	0.834971	0
DcbHLH090	0.305252	0.29044	0.516262	0.716295	0.398028	0.232021	0
DcbHLH091	6.41141	7.50894	5.02311	6.17368	4.93692	3.20475	7.96046
DcbHLH092	0	0	0	0	0.064991	0	0
DcbHLH093	8.39663	7.02635	6.40742	8.27394	6.81672	6.89153	6.45012
DcbHLH094	21.9407	24.5024	21.1906	24.9389	21.0146	19.3946	20.8646
DcbHLH095	14.3855	14.2667	13.1047	18.4982	11.3213	15.4252	11.8396
DcbHLH096	0.810003	0.4343	0.947144	0.329134	0.783469	0.984334	0.586651
DcbHLH097	1.08561	2.23124	1.23031	1.17003	1.99091	3.64784	1.71738
DcbHLH098	13.7885	10.917	3.58375	4.89923	6.48049	10.8721	9.62552
DcbHLH099	50.7659	7.62481	1.06212	3.24609	1.41744	5.48901	6.37746
DcbHLH100	16.1424	17.521	11.0371	9.4352	17.3584	11.4642	15.0948
DcbHLH101	12.5462	7.40373	4.83597	5.79183	12.2698	9.02464	7.33387
DcbHLH102	2.39557	3.57449	3.93686	4.70369	1.05126	3.79865	2.85848
DcbHLH103	16.8359	10.5276	11.3787	11.4528	11.5425	6.38259	15.1753
DcbHLH104	6.1162	14.5829	7.07371	13.4759	16.7204	11.9871	28.5596
DcbHLH105	4.90675	5.48142	2.4255	5.79404	6.31125	2.43404	10.4055
DcbHLH106	4.81335	0.904429	0.26604	0.732098	1.05477	4.86032	0.864382
DcbHLH107	11.0086	11.7782	15.7921	7.26651	18.8323	15.0511	0.864648
